# Supplementary material for: In Vivo Investigation into Effectiveness of Fe3O4/PLLA Nanofibers for Bone Tissue Engineering Applications
Source: MDPI journal article supplement (doi:10.3390/polym10070804), 2018-07-22
Supplement: s1 [file s1]

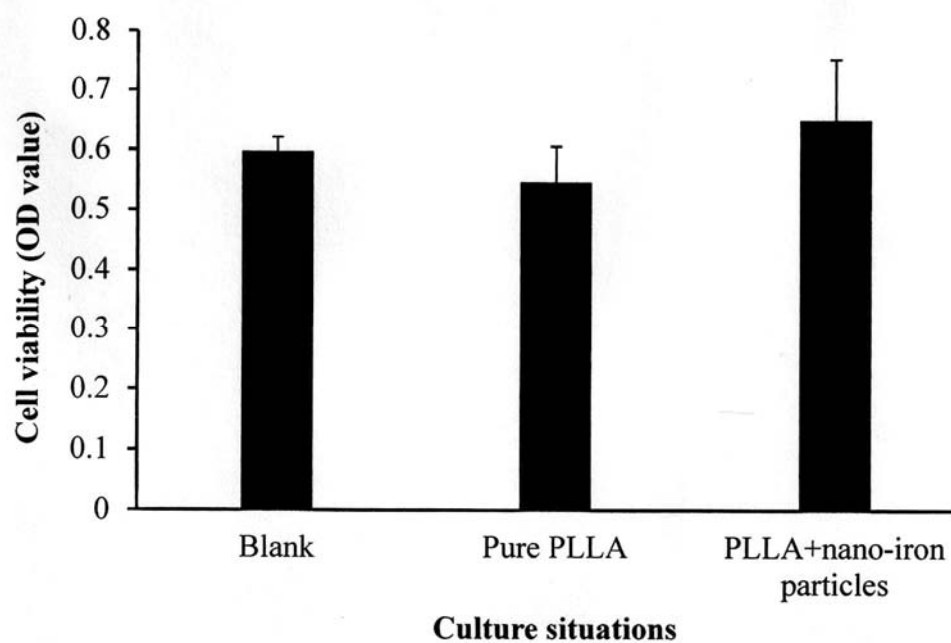

Figure S1. A set of experiment was performed to prove the non- cytotoxic evidence of the nanoparticles/PLLA composite. The cytotoxicity of the nano-Fe<sub>3</sub>O<sub>4</sub>/PLLA composites was evaluated by determining the viability of MG-63 cells after incubation in medium containing liquid extracts of the composites for 24 h.
